# Supplementary material for: Low-Toxicity Solvents for the Extraction of Valuable Lipid Compounds from Octopus (Octopus vulgaris) Waste
Source: MDPI journal article supplement (doi:10.3390/foods12193631), 2023-09-30
Supplement: s1 [file s1]

### Supplementary material

**Table S1.** Fatty acid (FA) profile (g·100 g<sup>-1</sup> total FAs) of initial octopus by-products extracted with the conventional procedure and of lyophilised by-products extracted with ethanol and with ethanol/ethyl acetate (0.50:0.50)

| FA               | Initial by-products | Ethanol-extracted<br>lyophilised by-<br>products | Ethanol/ethyl acetate<br>(0.50:0.50)-extracted<br>lyophilised by-<br>products |
|------------------|---------------------|--------------------------------------------------|-------------------------------------------------------------------------------|
| C14:0            | 3.00 ± 0.06         | 3.53 ± 0.04                                      | 3.48 ± 0.04                                                                   |
| C15:0            | 0.73 ± 0.09         | 0.78 ± 0.06                                      | 0.85 ± 0.01                                                                   |
| C16:0            | 17.77 ± 0.17        | 17.22 ± 0.06                                     | 16.84 ± 0.30                                                                  |
| C16:1 $\omega$ 7 | 3.70 ± 0.07         | 5.17 ± 0.02                                      | 5.19 ± 0.05                                                                   |
| C17:0            | 1.50 ± 0.04         | 1.50 ± 0.08                                      | 1.46 ± 0.01                                                                   |
| C18:0            | 8.90 ± 0.18         | 6.95 ± 0.02                                      | 6.98 ± 0.00                                                                   |
| C18:1 $\omega$ 9 | 6.81 ± 0.10         | 7.28 ± 0.03                                      | 7.60 ± 0.00                                                                   |
| C18:1 $\omega$ 7 | 3.83 ± 0.13         | 4.49 ± 0.04                                      | 4.85 ± 0.03                                                                   |
| C18:2 $\omega$ 6 | 0.75 ± 0.02         | 0.81 ± 0.02                                      | 0.83 ± 0.09                                                                   |
| C20:1 $\omega$ 9 | 3.22 ± 0.04         | 2.75 ± 0.01                                      | 3.00 ± 0.02                                                                   |
| C20:2 $\omega$ 6 | 0.89 ± 0.08         | 1.00 ± 0.00                                      | 1.11 ± 0.01                                                                   |
| C20:4 $\omega$ 6 | 9.74 ± 0.05         | 8.37 ± 0.10                                      | 8.02 ± 0.13                                                                   |
| C22:1 $\omega$ 9 | 0.85 ± 0.04         | 0.66 ± 0.01                                      | 0.68 ± 0.02                                                                   |
| C20:5 $\omega$ 3 | 12.89 ± 0.11        | 14.45 ± 0.00                                     | 14.00 ± 0.02                                                                  |
| C22:4 $\omega$ 6 | 1.12 ± 0.01         | 0.91 ± 0.01                                      | 0.93 ± 0.05                                                                   |
| C24:1 $\omega$ 9 | 0.40 ± 0.02         | 0.27 ± 0.00                                      | 0.26 ± 0.02                                                                   |
| C22:5 $\omega$ 3 | 1.63 ± 0.10         | 1.57 ± 0.03                                      | 1.84 ± 0.05                                                                   |
| C22:6 $\omega$ 3 | 22.25 ± 0.08        | 22.31 ± 0.11                                     | 22.07 ± 0.22                                                                  |
